# Supplementary material for: Circular RNA TTN Acts As a miR-432 Sponge to Facilitate Proliferation and Differentiation of Myoblasts via the IGF2/PI3K/AKT Signaling Pathway
Source: PubMed Central journal article supplement (PMC6881651; doi:10.1016/j.omtn.2019.10.019), 2019-10-25
Supplement: mmc1.pdf [file mmc1.pdf]

OMTN, Volume 18

## **Supplemental Information**

### **Circular RNA TTN Acts As a miR-432 Sponge to Facilitate Proliferation and Differentiation of Myoblasts via the IGF2/PI3K/AKT Signaling Pathway**

**Xiaogang Wang, Xiukai Cao, Dong Dong, Xuemei Shen, Jie Cheng, Rui Jiang, Zhaoxin Yang, Shujun Peng, Yongzhen Huang, Xianyong Lan, Ibrahim Elsaied Elnour, Chuzhao Lei, and Hong Chen**

**Supplemental Information**

**Table S1. Primers for qPCR**

| <b>Name</b> | <b>Forward primer 5'→3'</b>                          | <b>Reverse primer 5'→3'</b> |
|-------------|------------------------------------------------------|-----------------------------|
| CircTTN     | AAAGAACTTCCACCTCCTAAA                                | CGACAACCTTTTTAGCATCTT       |
| Bta-miR-432 | CGGCTCTTGGAGTAGGTCATT                                | GCAGGGTCCGAGGTATTC          |
| miR-432-RT  | GTCGTATCCAGTGCAGGGTCCGAGGTATTTCGCACTGGATAACGACCCACCC |                             |
| U6          | GCTTCGGCAGCACATATACTAAAAT                            | CGCTTCACGAATTTGCGTGTTCAT    |
| GAPDH       | TGAGGACCAGGTTGTCTCCTGCG                              | CACCACCCTGTTGCTGTAGCCA      |
| MYF5        | CTGCAGGAGCTGCTTAGGGA                                 | AGGCATGCCATCAGAGCAAC        |
| MYOD        | CGCTCCAACCTGTTCCGACG                                 | AAAGGGCATGTGGGAAGGAG        |
| MYOG        | AGGGGATCATCTGCTCCAG                                  | ATCCCGGCAGACAATCTCAG        |
| MYHC        | GGAGGCTGATGAACAAGCCAA                                | GAAGTCTCGGGTCTTTGCTCT       |
| PCNA        | TCCAGAACAAGAGTATAGC                                  | TACAACAGCATCTCCAAT          |
| CDK2        | TCTTTGCTGAGATGGTGACCC                                | CATCTTCATCCAGGGGAGGC        |
| CyclinD1    | CCGTCCATGCGGAAGATC                                   | CAGGAAGCGGTCCAGGTAG         |
| TTN         | AGGGCAATTACAGATTGGTGTG                               | AAACTGGCAGGTCATGGTACA       |
| IGF2        | CCGCAGGAGCTGAGACATCAA                                | CGGTCCCCACAGACAAACTG        |
| IRS1        | TTCGCCTACCATTTCCACC                                  | TGGGTAAGCGGGCATCATTT        |
| PI3K        | AGCGCTGAGCAGTGTATCTT                                 | AACCACGGGGCTCTTGAAAT        |
| PDK1        | GAAAATGCTAGGCGTCTGTGT                                | CACCTCCTCGGTCACTCATC        |
| AKT         | TCCCCAGTTCTCCTACTCG                                  | TCCTCTCCATCCTGTGTTGG        |

**Table S2. Primers for vector construction**

| <b>Name</b>                | <b>Primer sequence 5'→3'</b>                           |
|----------------------------|--------------------------------------------------------|
| PCD2.1-circTTN-F           | GGGGTACCAAGAGACCCAGGTAGAAGCTA                          |
| PCD2.1-circTTN-R           | CGGGATCCCGTAATCTTCCTCTGGTTCCT                          |
| psiCHECK2-circTTN-F        | CCGCTCGAGAAGAGACCCAGGTAGAAGCTA                         |
| psiCHECK2-circTTN-R        | ATAAGAATGCGGCCCGTAATCTTCCTCTGGTTCCT                    |
| psiCHECK2-miR-432-Sensor-F | TCGACCACCAATGACCTACTCCAAGACCACCAATGA<br>CCTACTCCAAGA   |
| psiCHECK2-miR-432-Sensor-R | GGCCTCTTGGAGTAGGTCATTGGGTGGTCTTGGAGTAG<br>GTCATTGGGTGG |
| psiCHECK2-IGF2-W-F         | CCGCTCGAGTGCAGGTAGGCTTGTCTTG                           |
| psiCHECK2-IGF2-W-R         | ATAAGAATGCGGCCGCTTGGAGTGTGGGGGTGTTTT                   |
| IGF2-MUT-F                 | CTGCTCCTCCCAAGAGTTTCCATCA                              |
| IGF2-MUT-R                 | TGATGGAAACTCTTGGGAGGAGCAG                              |
| psiCHECK2-IGF1-W-F         | GAAAGAGTCTGGCCAAAACGG                                  |
| psiCHECK2-IGF1-W-R         | CAGATGTTTGTTCCTCAGCGAG                                 |
| IGF1-MUT-F                 | GCTCCCGCATTATGCCTTTAGGGAA                              |
| IGF1-MUT-R                 | TTCCTAAAGGCATAATGCGGGAGC                               |

**Text S1. Sequence of cattle circTTN**

**>circTTN**

TGACCAAAAAAGCTGTGAAGAAAGATGCTAAAAAGGTTGTCGCAAAGCCCAAGGAAGAG  
GCACCGCCACCTAAAGTTATAGAGGTTCCCAAGAAGCCACCACGTCCTACTGCCTTAATTCC  
AGCAGAAGCACCTGAAATTATTGATGTATCCTCCAAGGCTGAAGAAGTGAAAATAACGACC  
ATAACCAGAAAGAAAGAGGTTTCAGAAAGAAAAAGAAGCTGTGTATGAGAGAAAGCAAGC  
AGTCTACGAGGAGAAGAAAGTTTACATAGAATCTTTGGAAGAACCTTACGATGAGCTAGAG  
GTGGAAACGTATACGGAGCCATATGAAGAACCTTATTATGAGGAACCAGAGGAAGATTACG  
AAGAGACCCAGGTAGAAGCTAAGAGGGAAGTTCATGAGGAATGGGAAGAAGATTTTGAAG  
AAGGGCAAGAATACTATGAAAGGGAGGAAGGTTATGACGAAGGAGAGGAAGAGTGGGAG  
GAGACTTACCAAGAGAGAGAAGTCGTCCAAGTTCAAAGGAGGTTTATGAAGAATCACGT  
GAGAGGAAAATTCCAGCAAAAGTACCTGAAAAGAAAGAACTTCCACCTCCTAAAGTTGTA  
AAGAAGCCTGTAGTTGAAAAAATTGAAAAGACTTCTCGAAGAATGGAGGAAGAAAAAGTT  
CAAGTCACCAAAG

Figure S1

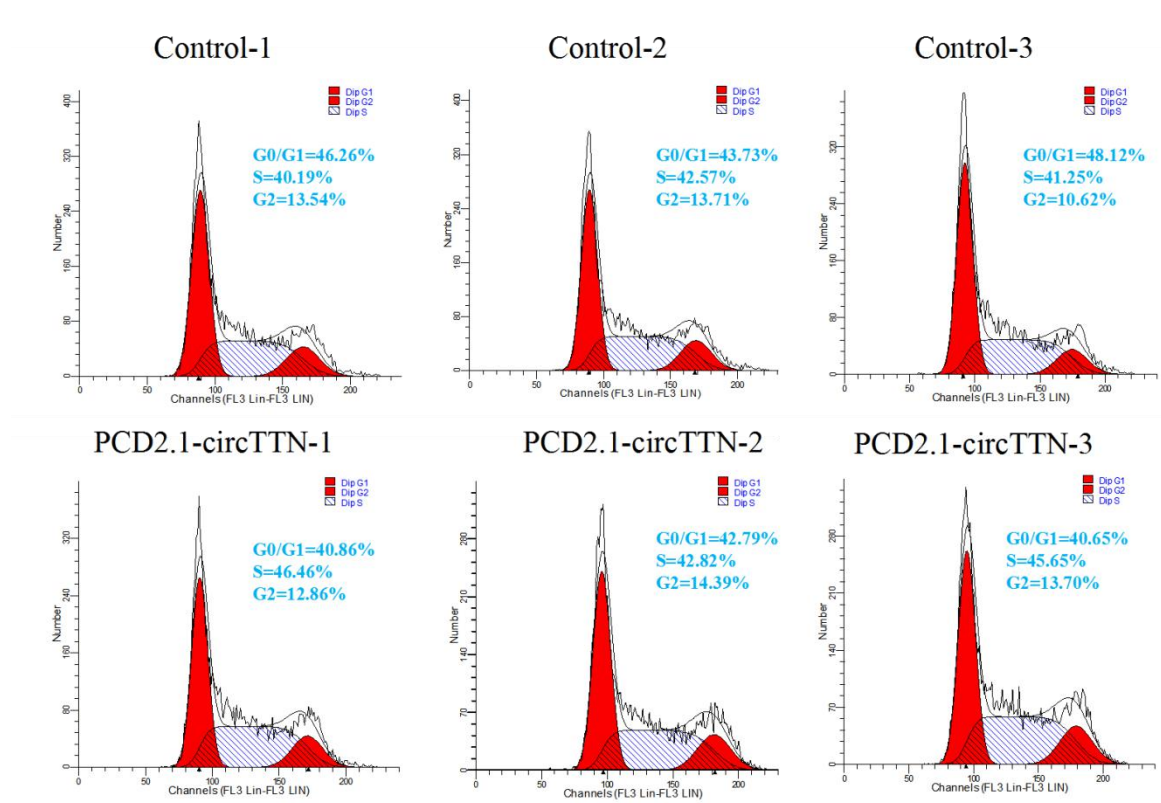

Figure S1. Bovine primary myoblasts were transfected with PCD2.1-circTTN, and cell phases were analyzed by flow cytometry

**Figure S2**

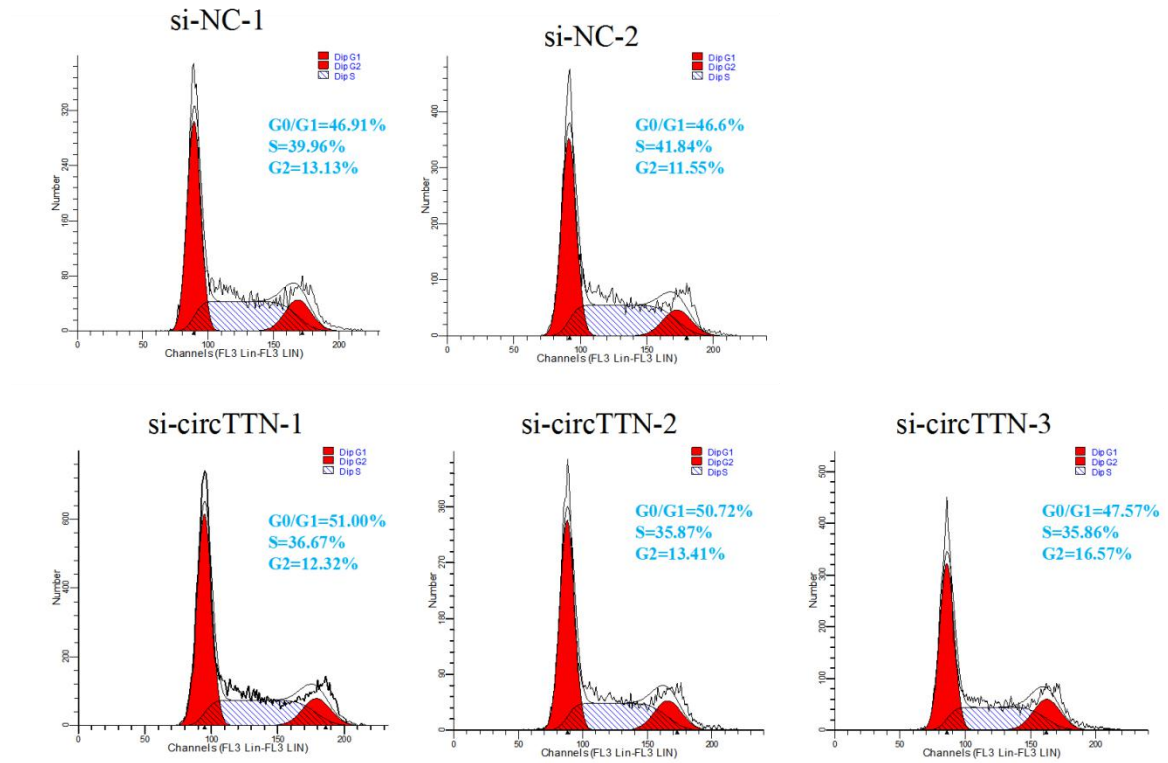

**Figure S2. Bovine primary myoblasts were transfected with si-circTTN, and cell phases were analyzed by flow cytometry**

Figure S3

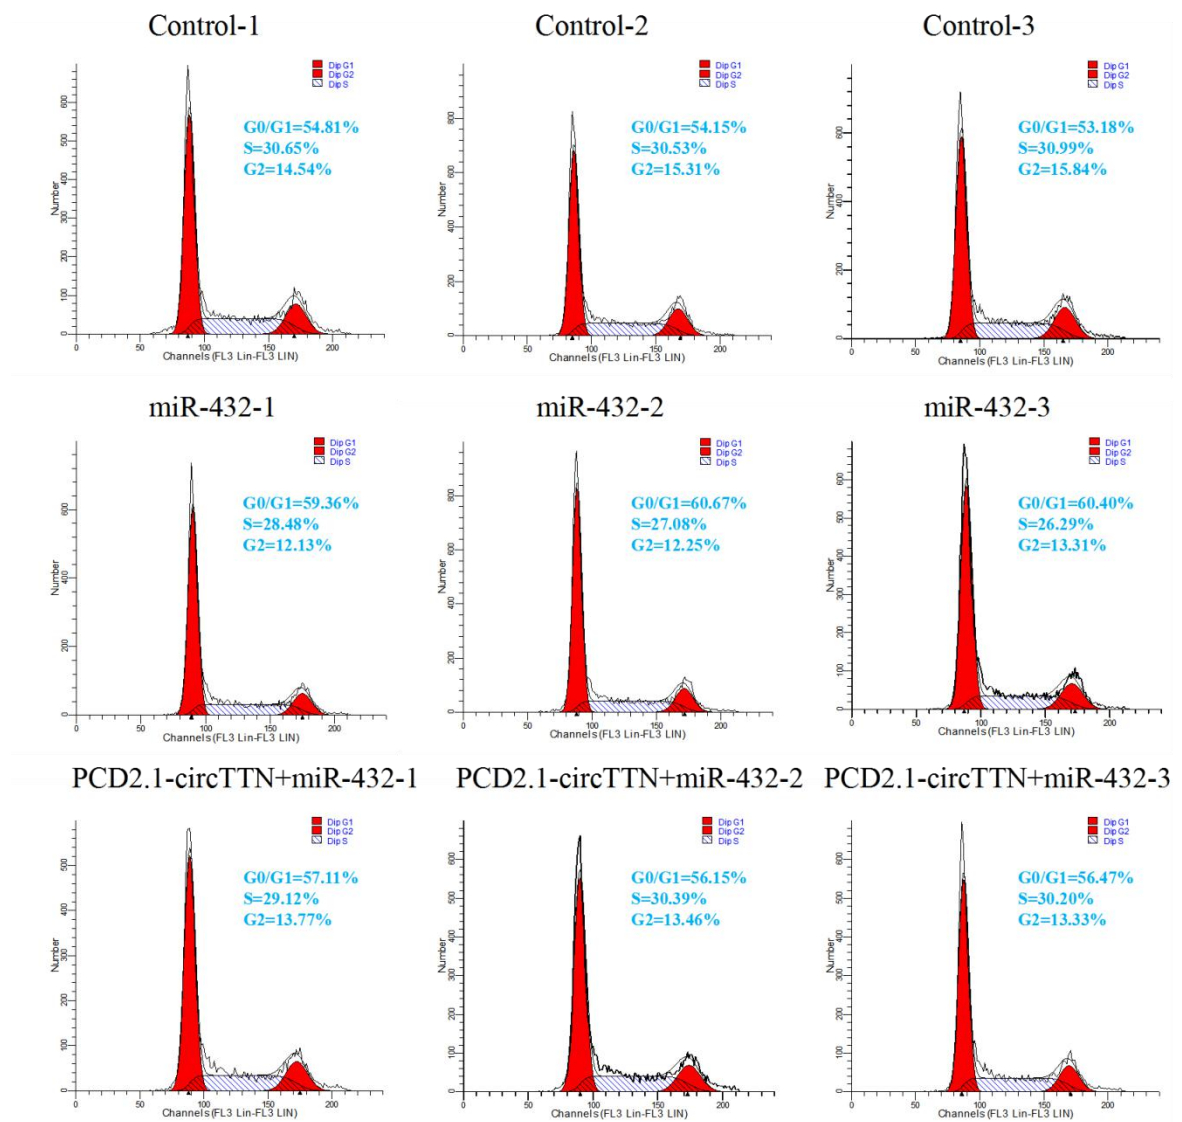

Figure S3. Bovine primary myoblasts were transfected with miR-432 mimic and/or PCD2.1-circTTN, and cell phases were analyzed by flow cytometry

Figure S4

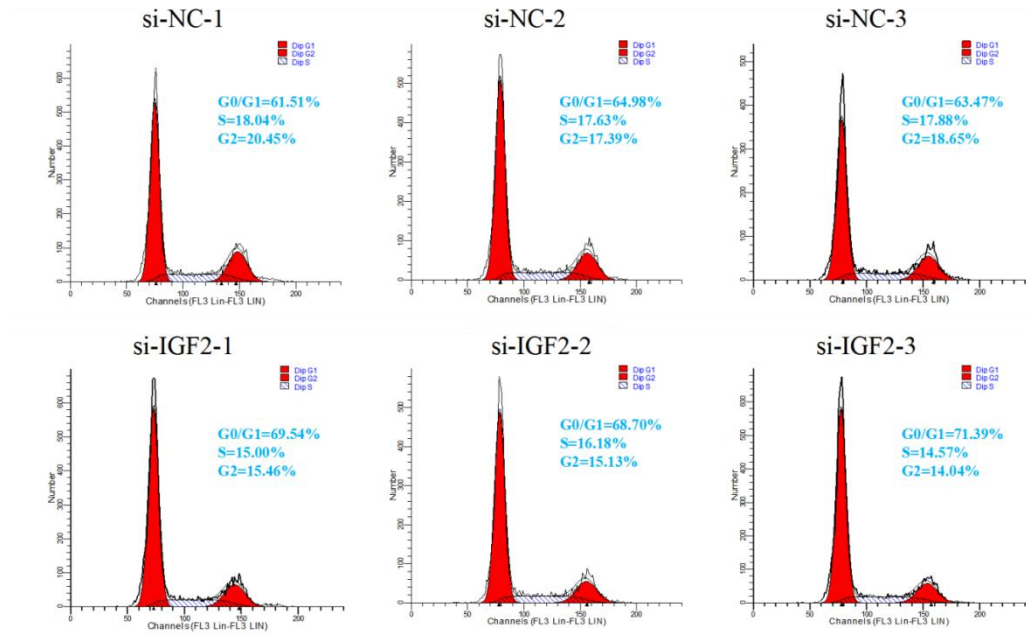

Figure S4. Bovine primary myoblasts were transfected with si-IGF2, and cell phases were analyzed by flow cytometry



**Figure S5**

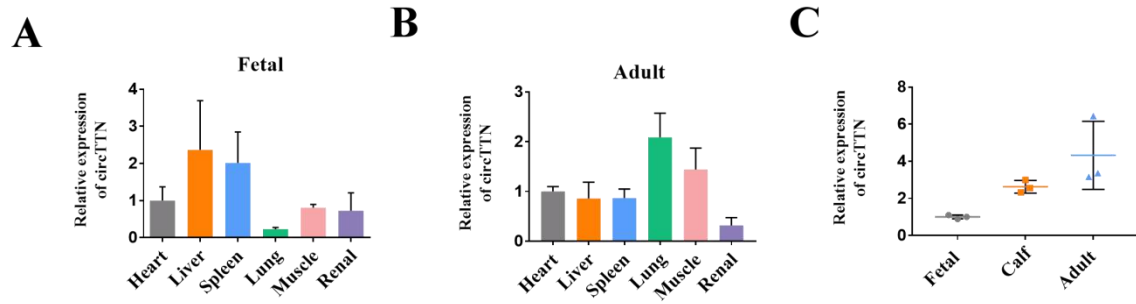

(A and B) The expression of circTTN in different tissues of Qinchuan cattle at embryonic (A) and adult (B) stage. (C) The expression of circTTN in skeletal muscle of cattle at the fetal stage, calf stage and adult stage.

**Figure S6**

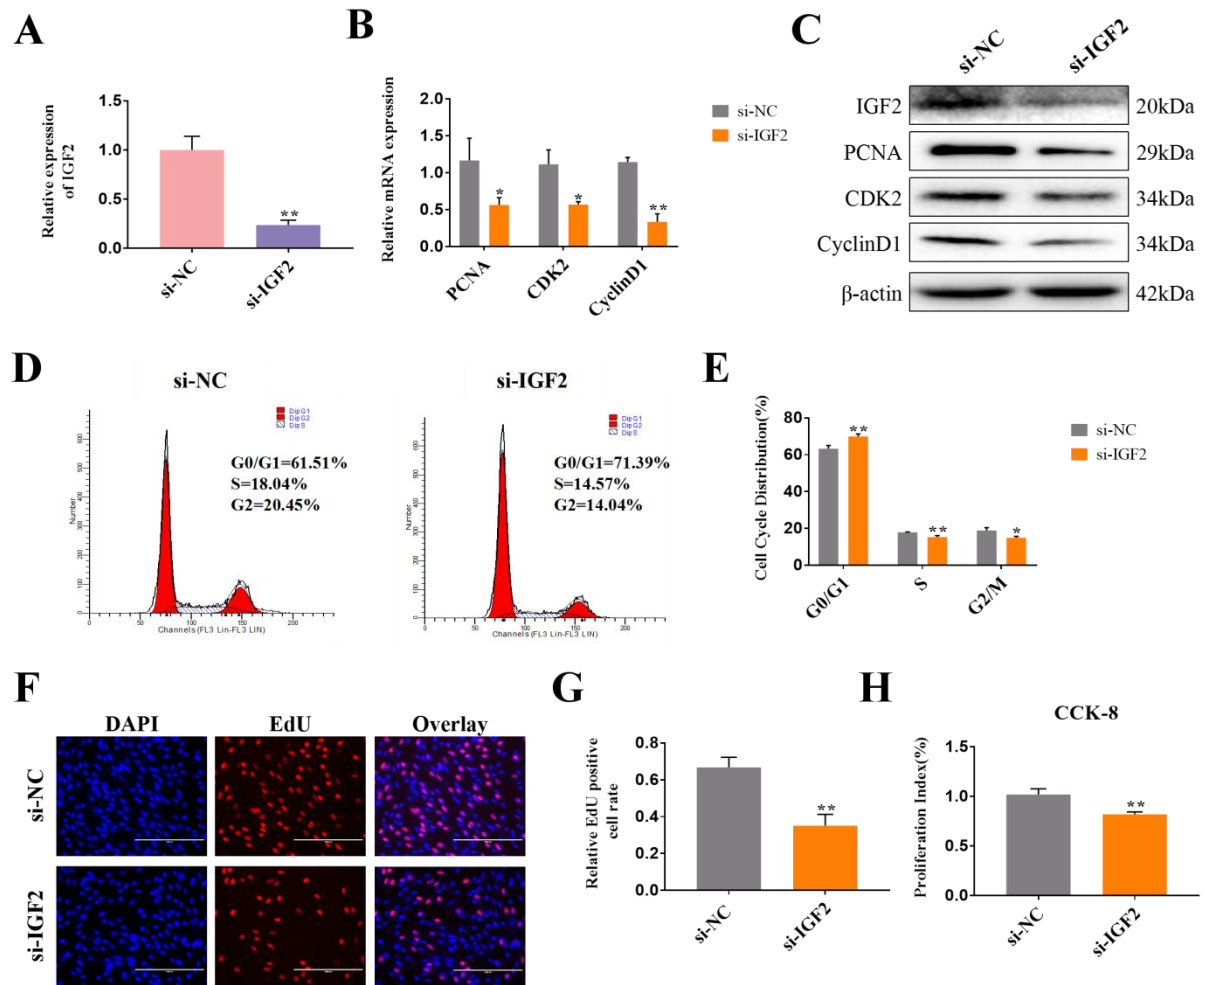

**Figure S6 Effect of *IGF2* Knockdown on Proliferation of Bovine Primary Myoblasts**

(A) The interference efficiency of the si-*IGF2* is detected by RT-qPCR. (B) Detection of the expression levels of the cell proliferation genes mRNA (*PCNA*, *CDK2*, *Cyclin D1*) by RT-qPCR. (C) Detection of *PCNA*, *CDK2*, and *Cyclin D1* protein expression levels by western blot analysis,  $\beta$ -actin acts as an internal control gene. (D and E) Bovine primary myoblasts were transfected with si-*IGF2*, and cell phases were analyzed by flow cytometry (D) and counted (E). (F and G) Cell proliferation was detected by 5-ethynyl-2'-deoxyuridine (EdU) (F) and counted using Image J (G). Scale bar indicates 200  $\mu$ m. (H) Cell proliferation index was detected by cell counting kit-8 (CCK-8) assay. Data are presented as means  $\pm$  SEM for three individuals. \* $P < 0.05$ ; \*\* $P < 0.01$ .

**Figure S7**

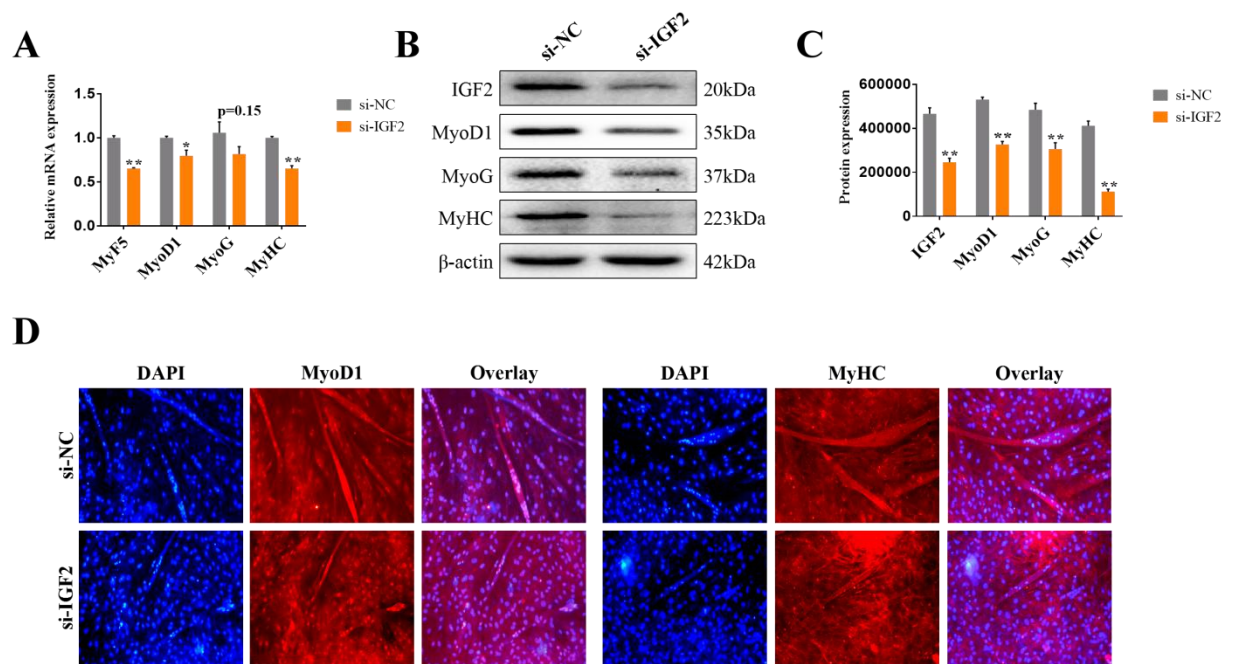

**Figure S7 Effect of IGF2 Knockdown on Differentiation of Bovine Primary Myoblasts**

(A) Transfection of the si-IGF2 and the expression levels of myogenic differentiation marker genes *Myf5*, *MyoD1*, *MyoG*, and *MyHC* mRNA were detected by RT-qPCR. (B and C) *MyoD1*, *MyoG*, and *MyHC* protein levels were detected by western blot analysis (B), and protein band density was also analyzed by ImageJ (C). (D) Bovine primary myoblasts were transfected with si-IGF2 and cell differentiation was measured by immunofluorescence (*MyoD1* (left) and *MyHC* (right) ) and observed under a fluorescence microscope. Scale bar indicates 200  $\mu$ m. Data are presented as means  $\pm$  SEM for three individuals. \* $P < 0.05$ ; \*\* $P < 0.01$ .
